# Supplementary material for: Recycling of Plastics from Cable Waste from Automotive Industry in Poland as an Approach to the Circular Economy
Source: MDPI journal article supplement (doi:10.3390/polym13213845), 2021-11-07
Supplement: s1 [file s1]

*Supplementary information*

# **Recycling of Plastics from Cable Waste from Automotive Industry in Poland as an Approach to the Circular Economy**

**Dorota Czarnecka-Komorowska <sup>1,\*</sup>, Wiktoria Kanciak <sup>1</sup>, Mateusz Barczewski <sup>1</sup>, Roman Barczewski <sup>2</sup>, Roman Regulski <sup>3</sup>, Dariusz Sędziak <sup>3</sup> and Cezary Jędrzycka <sup>4</sup>**

<sup>1</sup> Faculty of Mechanical Engineering, Poznan University of Technology, 60-965 Poznan, Poland; wiktoria.kanciak@student.put.poznan.pl (W.K.), mateusz.barczewski@put.poznan.pl (M.B.)

<sup>2</sup> Institute of Applied Mechanics, Poznan University of Technology, 60-965 Poznan, Poland; roman.barczewski@put.poznan.pl

<sup>3</sup> Institute of Mechanical Technology, Poznan University of Technology, 60-965 Poznan, Poland; roman.regulski@put.poznan.pl (R.R.); dariusz.sedziak@put.poznan.pl (D.S.)

<sup>4</sup> Institute of Electrical Engineering and Electronics, Poznan University of Technology, 60-965 Poznan, Poland; cezary.jedryczka@put.poznan.pl

\* Correspondence: dorota.czarnecka-komorowska@put.poznan.pl; Tel.: +48-(61)-665-2732

**Supplementary information**

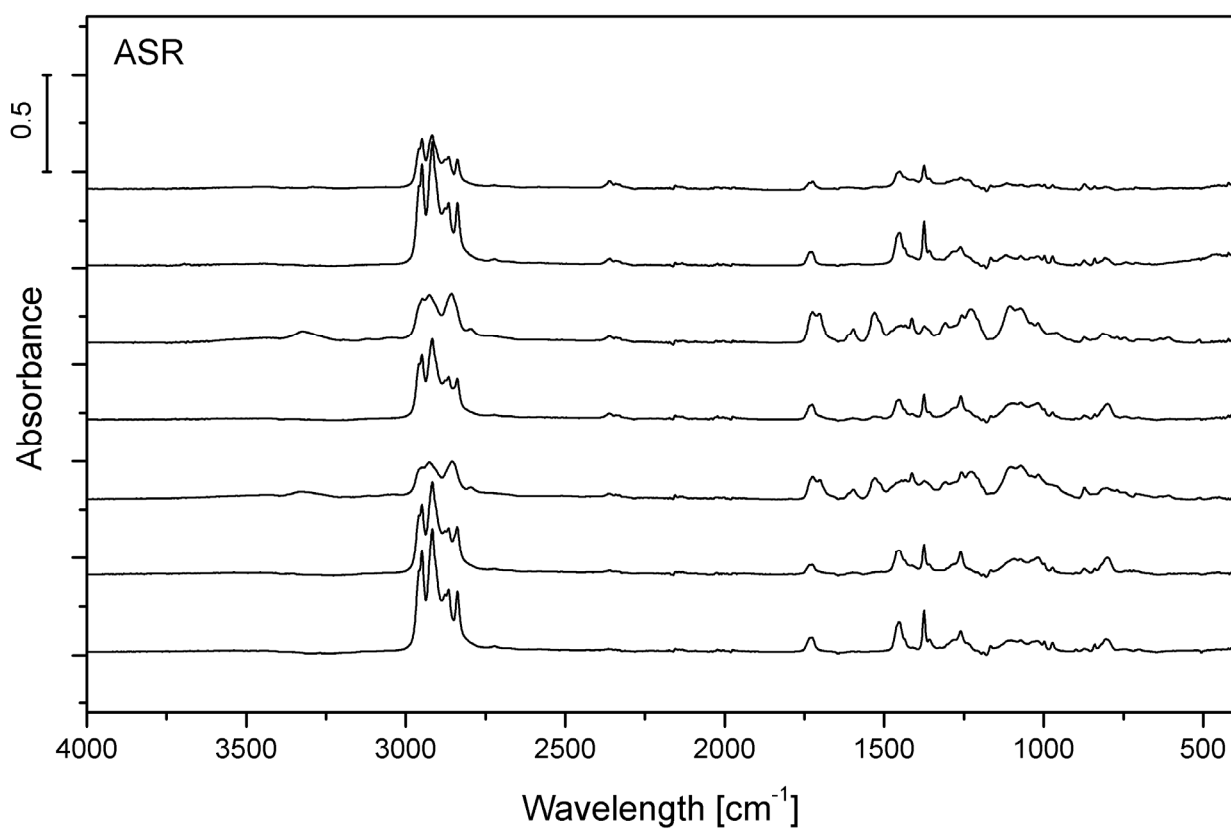

**Figure S1.** Selected FTIR-ATR spectra taken from ASR compression molded samples.

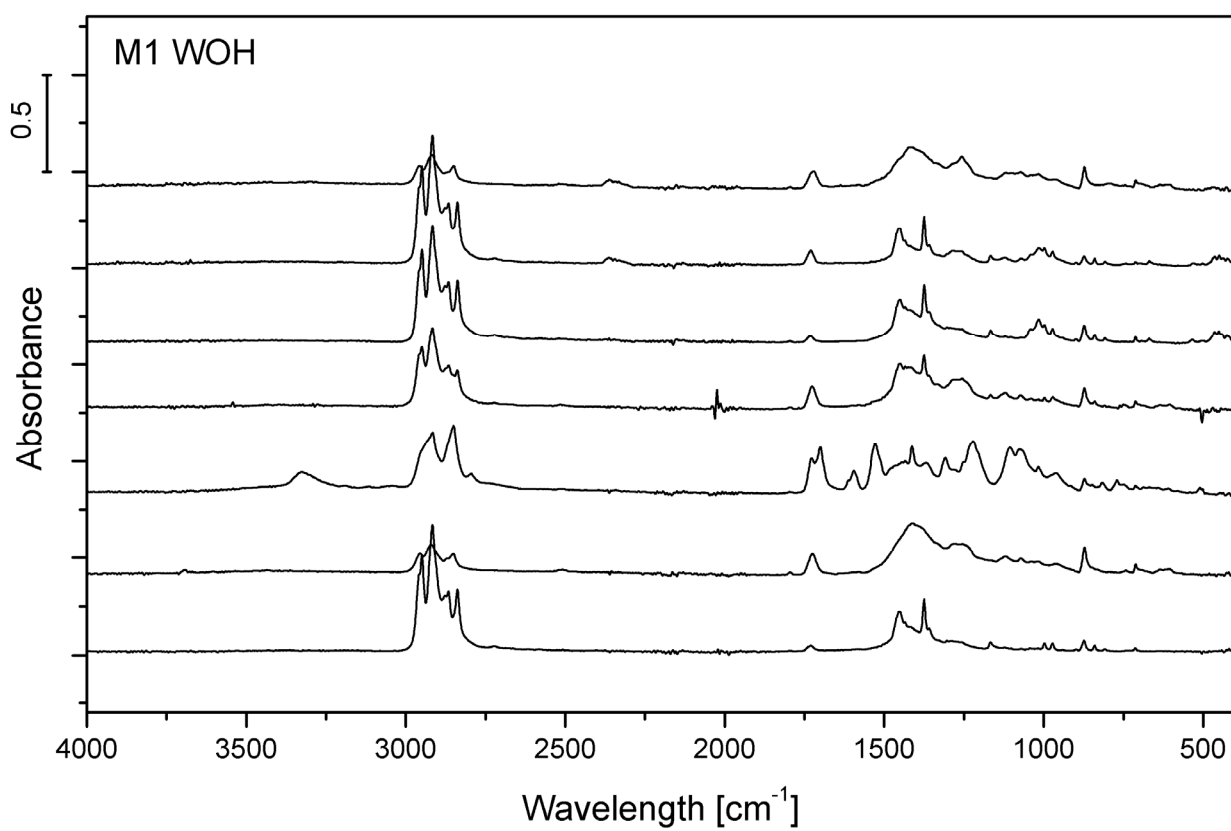

**Figure S2.** Selected FTIR-ATR spectra taken from M1 WOH compression molded samples.

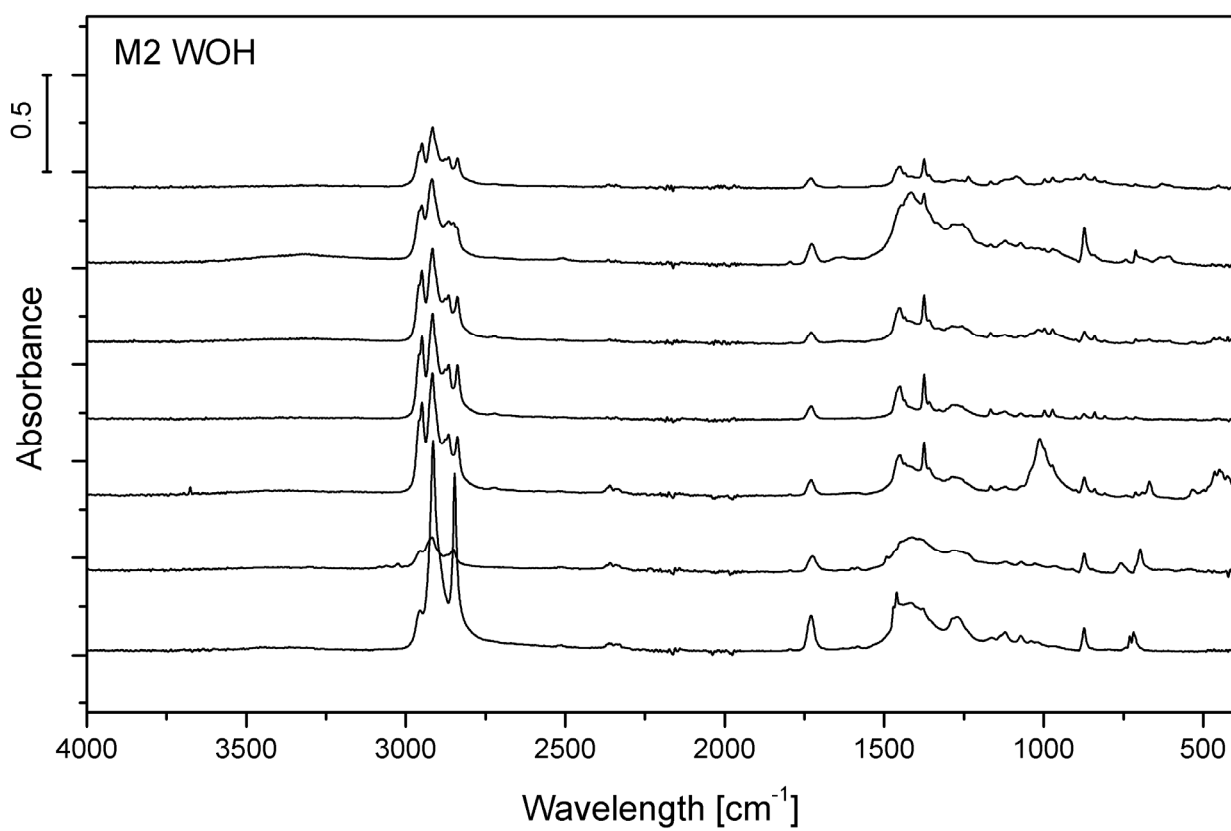

**Figure S3.** Selected FTIR-ATR spectra taken from M2 WOH compression molded samples.

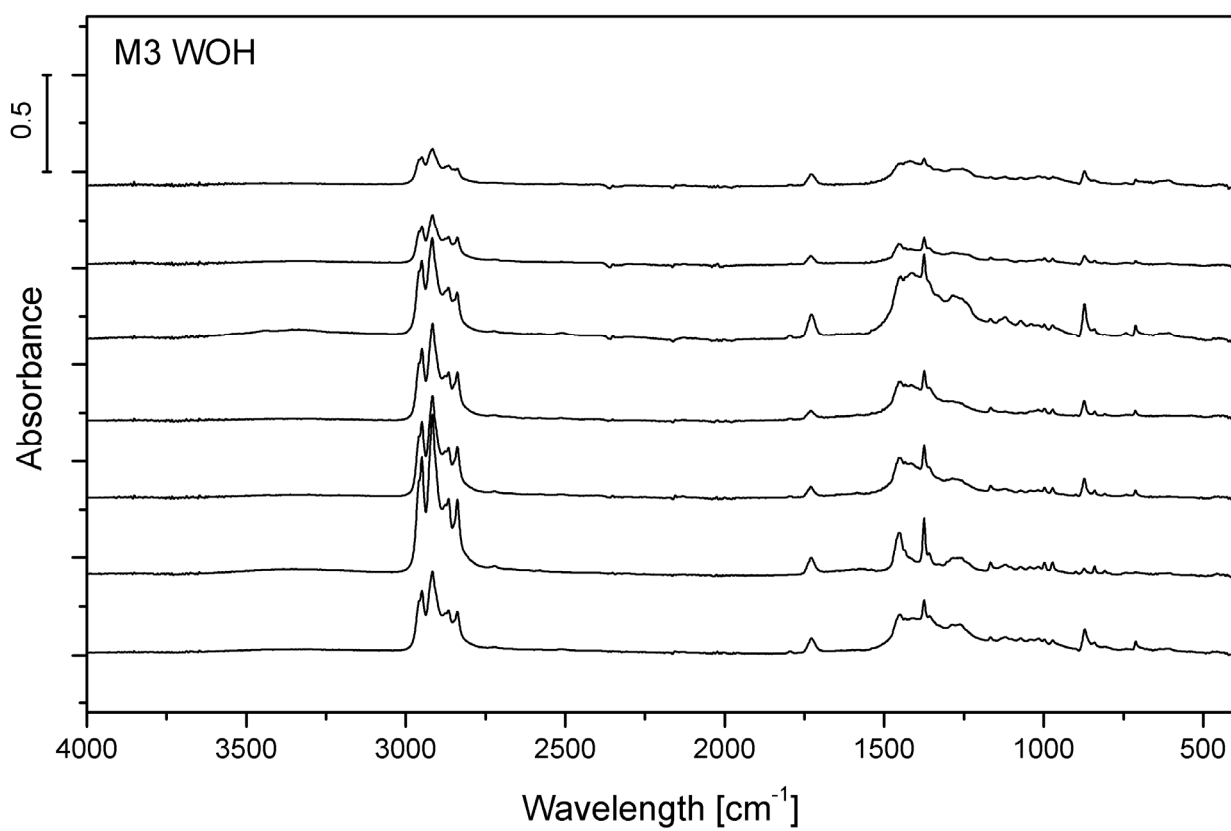

**Figure S4.** Selected FTIR-ATR spectra taken from M3 WOH compression molded samples.

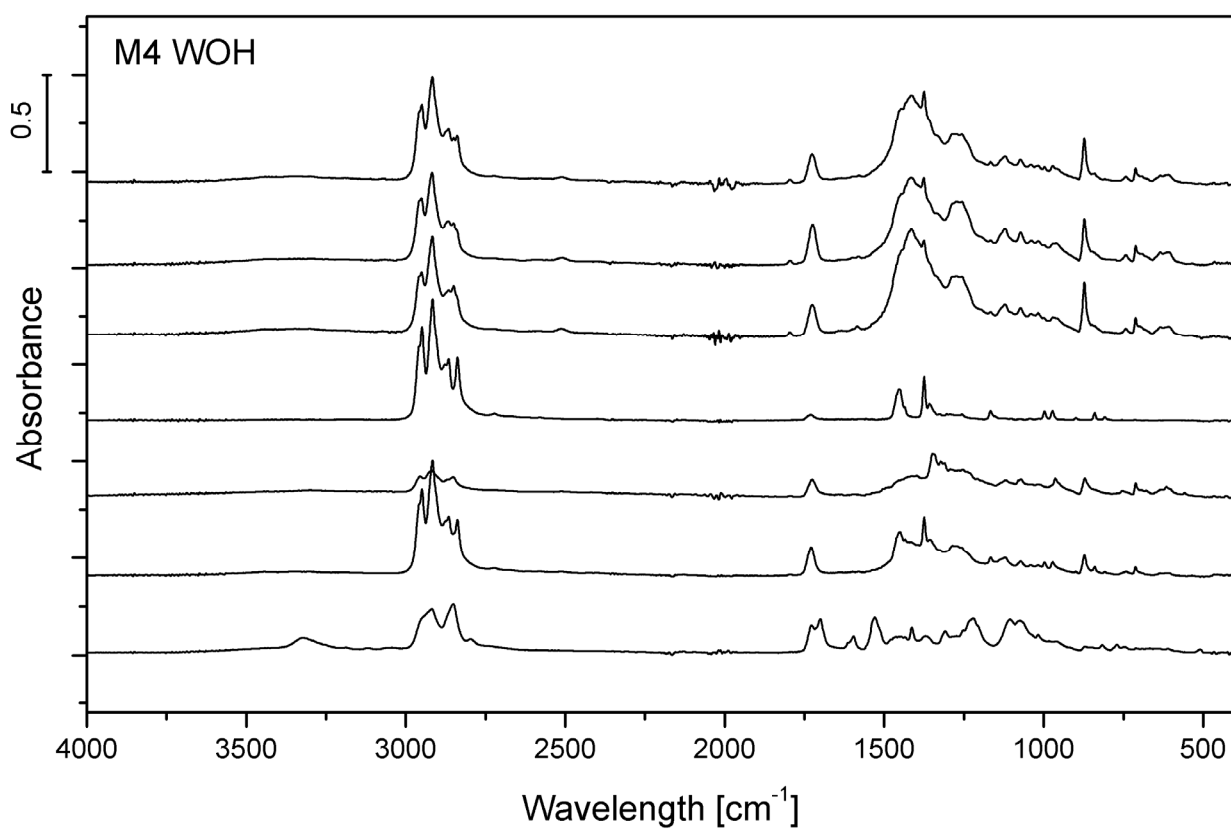

**Figure S5.** Selected FTIR-ATR spectra taken from M4 WOH compression molded samples.

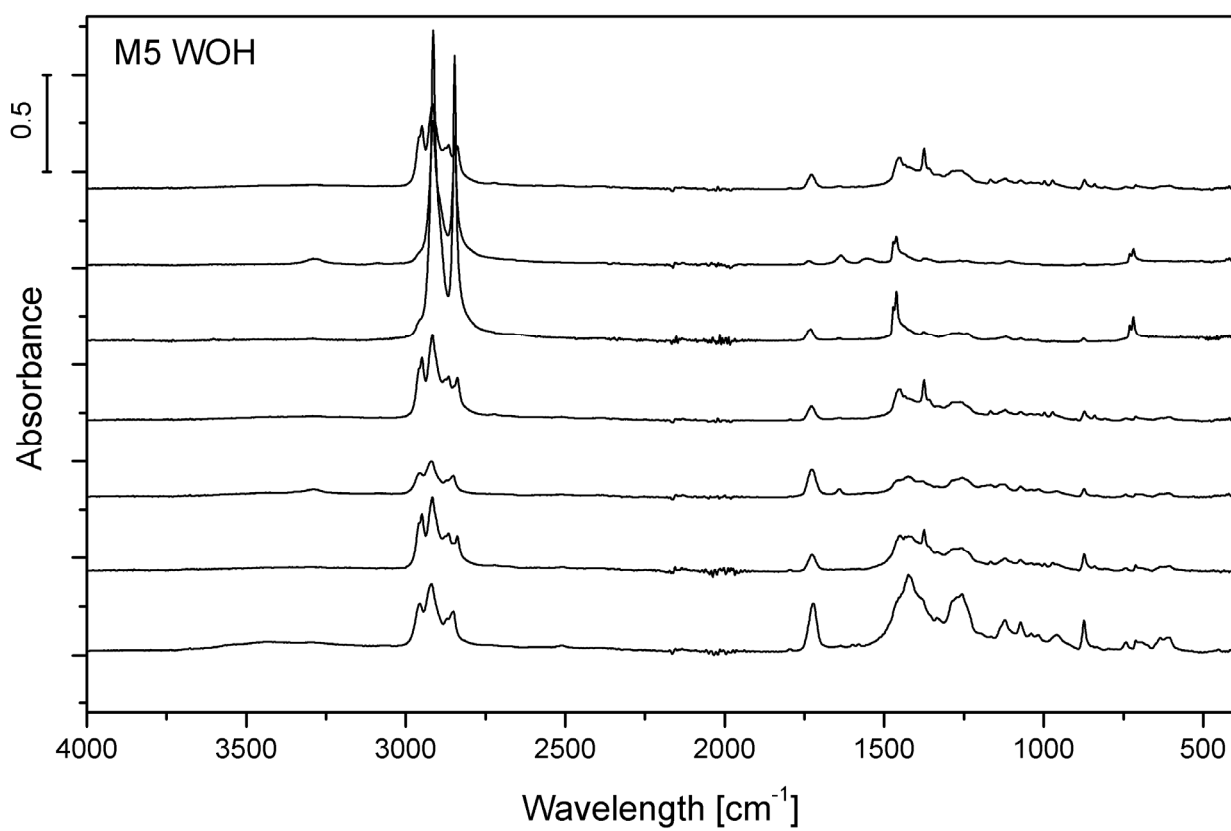

**Figure S6.** Selected FTIR-ATR spectra taken from M5 WOH compression molded samples.

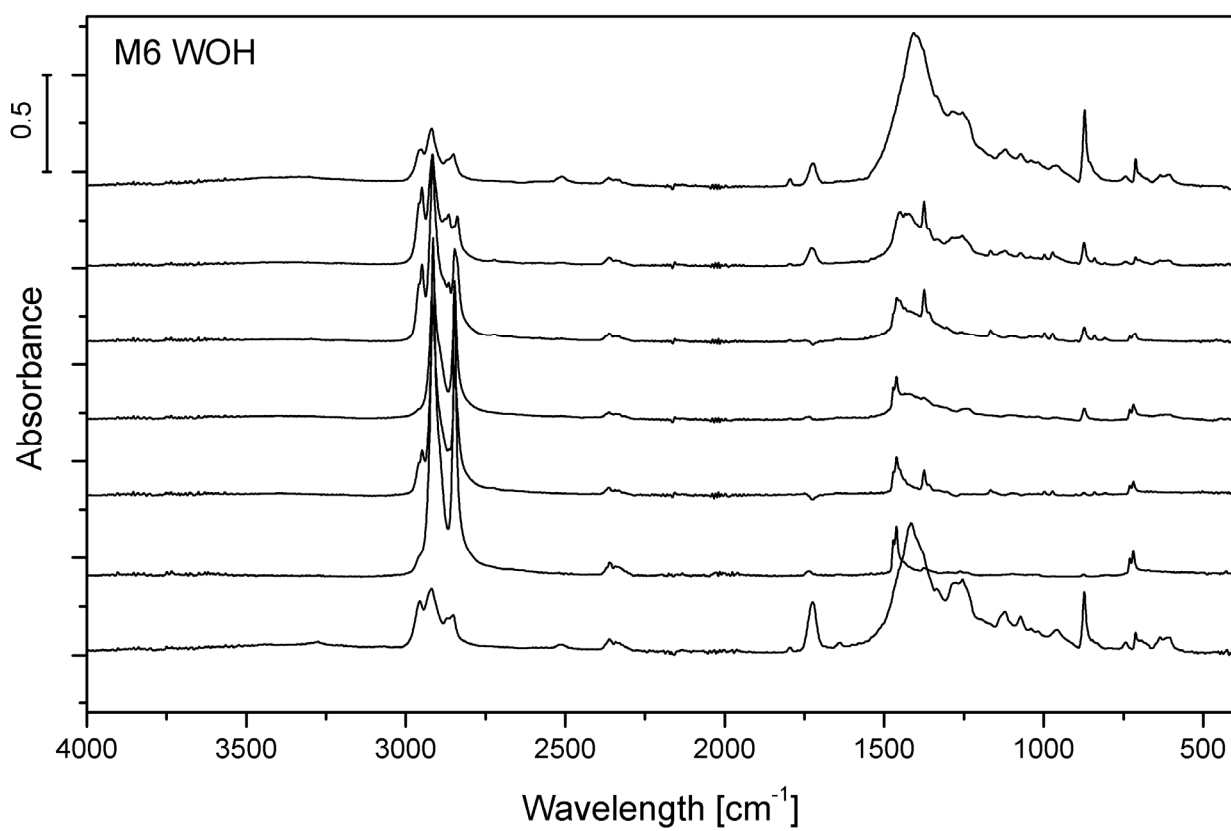

**Figure S7.** Selected FTIR-ATR spectra taken from M6 WOH compression molded samples.



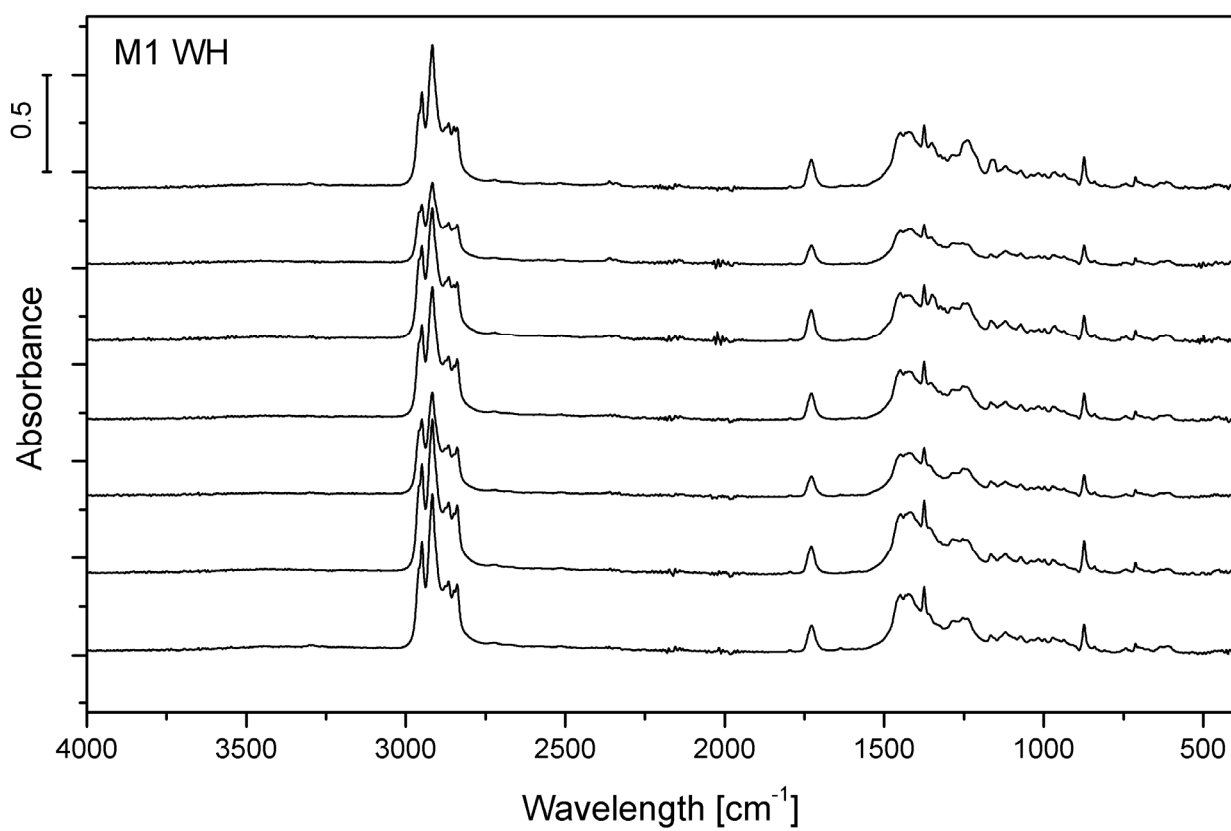

**Figure S8.** Selected FTIR-ATR spectra taken from M1 WH compression molded samples.

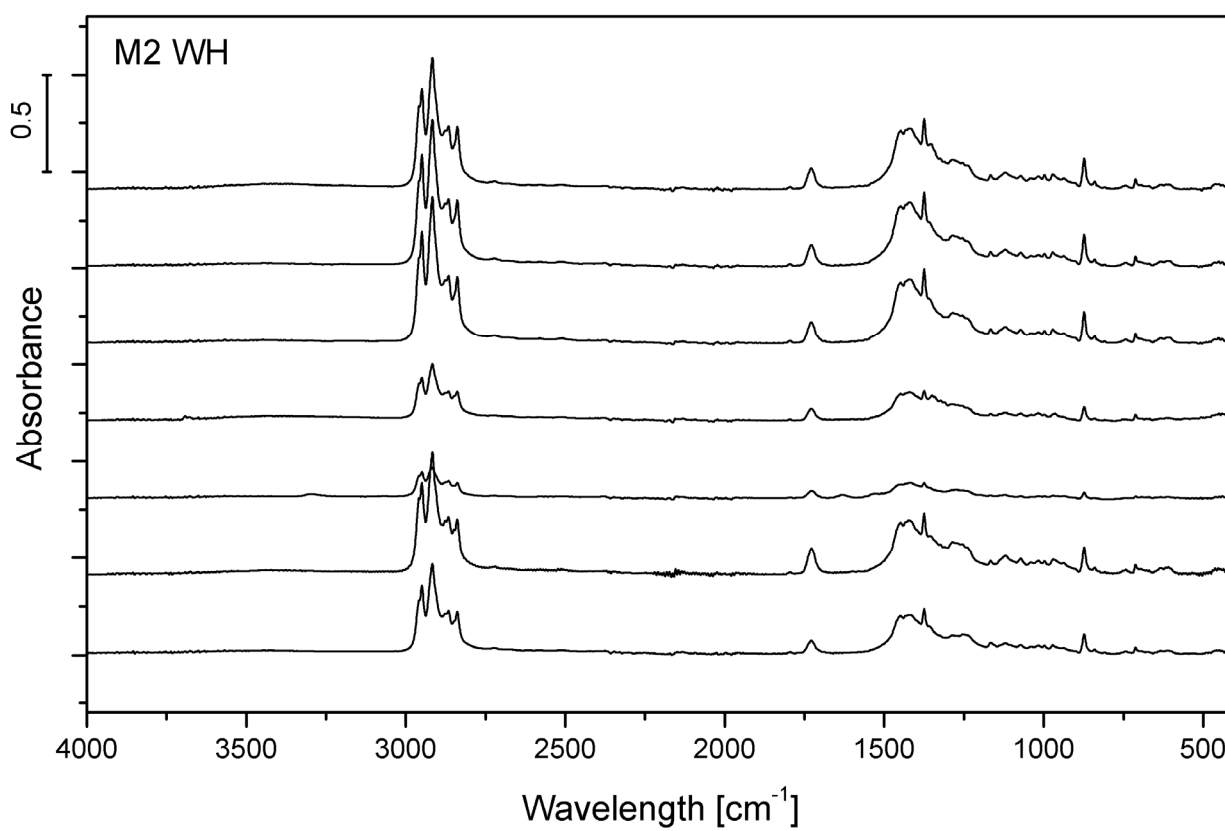

**Figure S9.** Selected FTIR-ATR spectra taken from M2 WH compression molded samples.

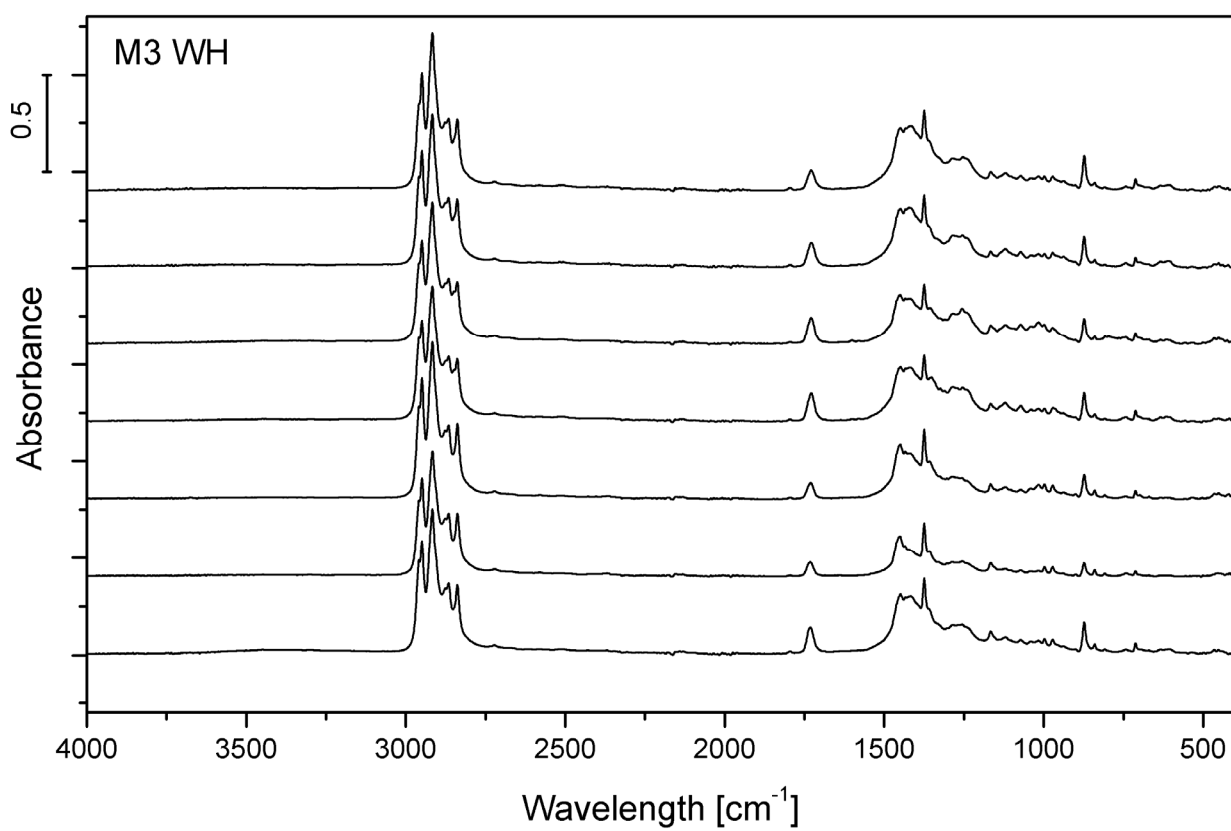

**Figure S10.** Selected FTIR-ATR spectra taken from M3 WH compression molded samples.

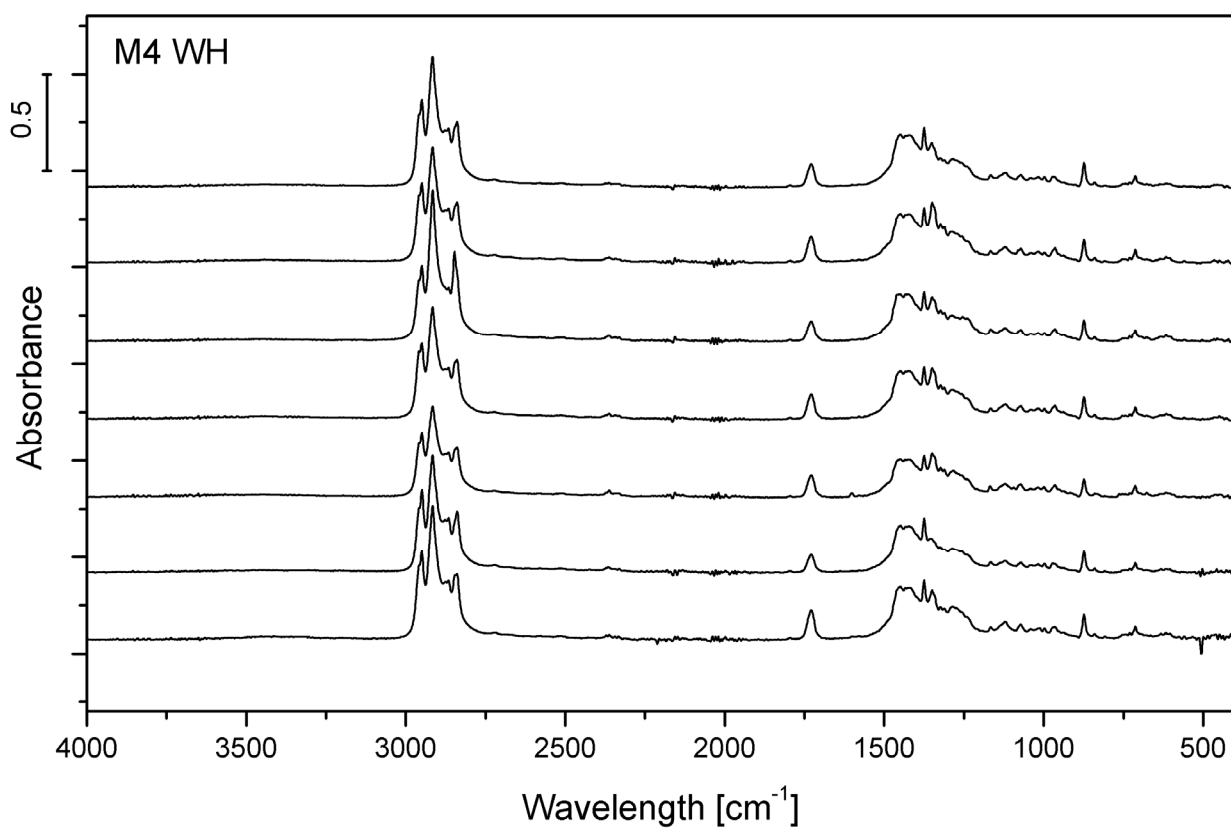

**Figure S11.** Selected FTIR-ATR spectra taken from M4 WH compression molded samples.

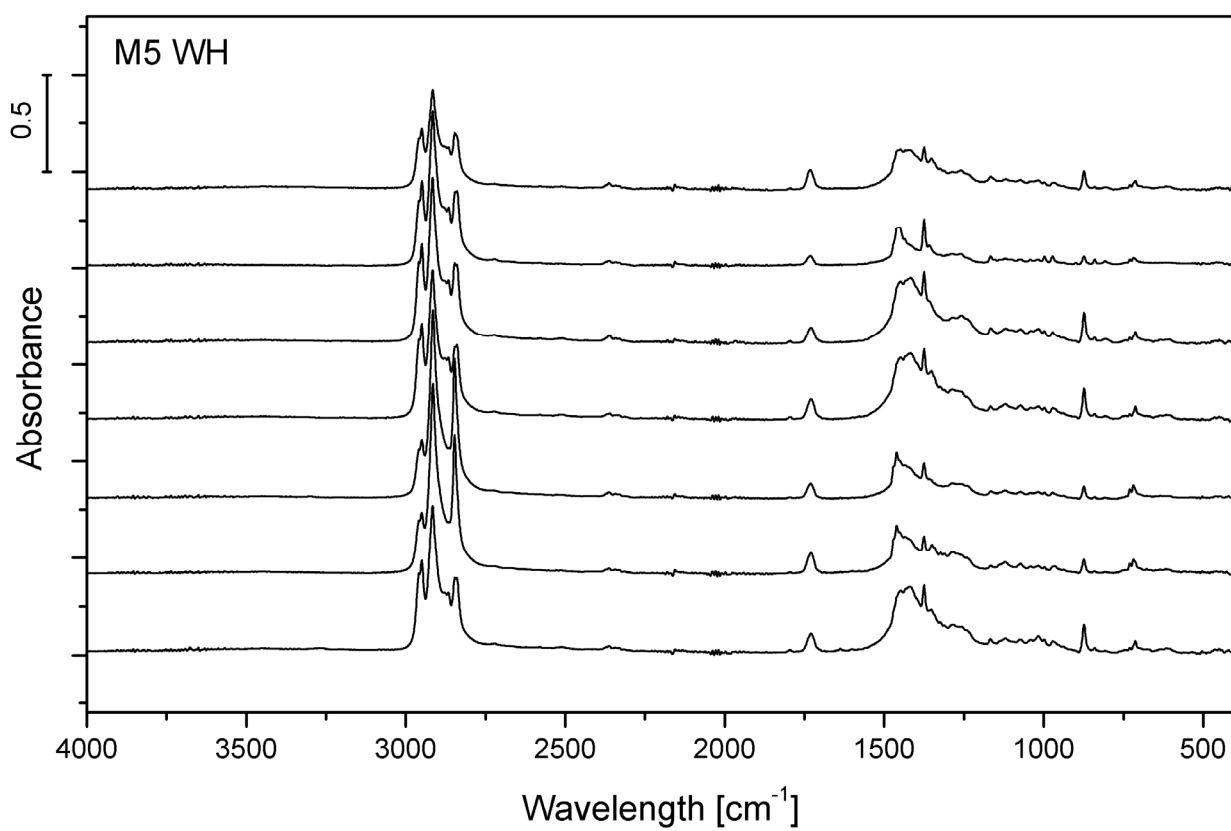

**Figure S12.** Selected FTIR-ATR spectra taken from M5 WH compression molded samples.

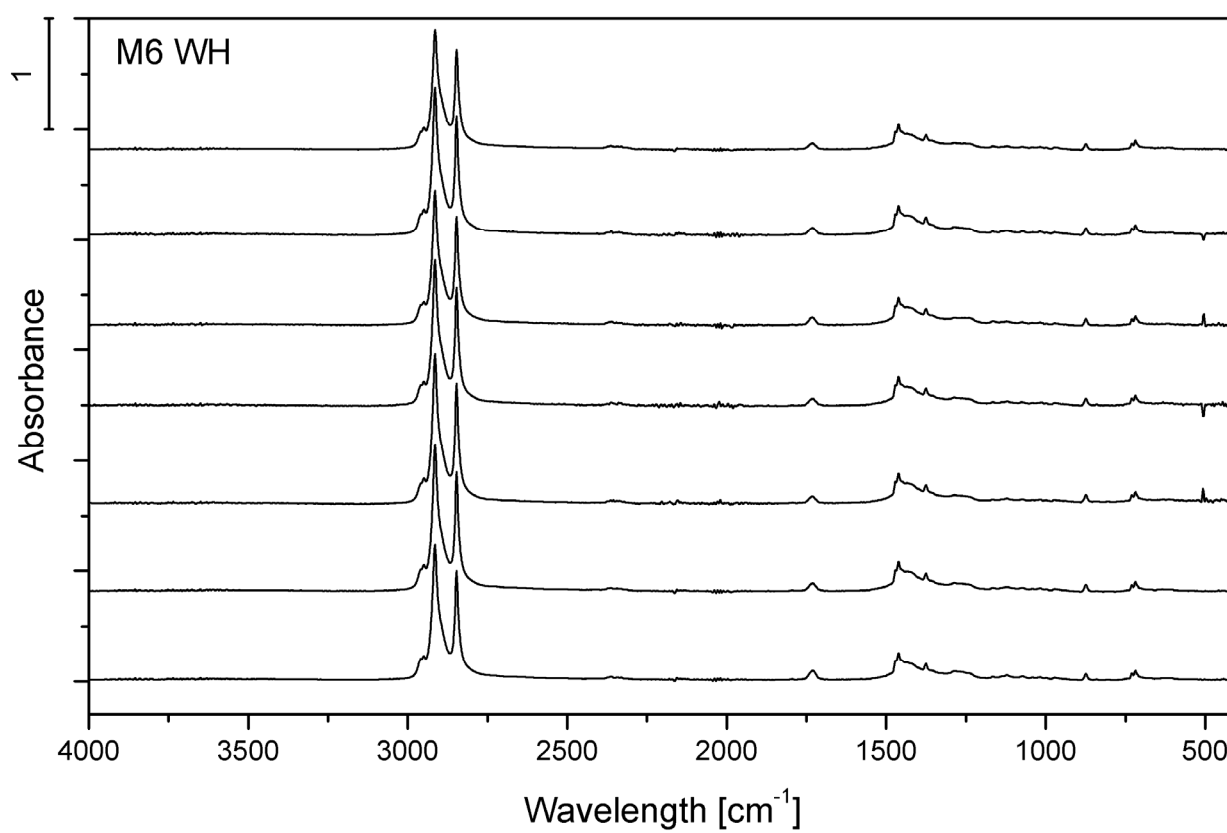

**Figure S13.** Selected FTIR-ATR spectra taken from M6 WH compression molded samples.

**Table S1.** FTIR-ATR spectra identification matches for selected points of compression-molded samples (average percentage value from 30 measurements).

| Sample | Match 1                           | Match 2                              | Residual matches                                                                                              |
|--------|-----------------------------------|--------------------------------------|---------------------------------------------------------------------------------------------------------------|
| ASR    | poly(vinyl chloride) (47%)        | cis-1,4-polyisoprene rubber (21%)    | polybutene<br>polyurethane                                                                                    |
| M1 WOH | poly(vinyl chloride) (42%)        | cis-1,4-polyisoprene rubber (16%)    | polypropylene<br>polybutene<br>hydrogenated styrene/butadiene<br>polyurethane                                 |
| M2 WOH | poly(vinyl chloride) (54%)        | cis-1,4-polyisoprene rubber (12%)    | high-density polyethylene<br>polybutene<br>hydrogenated styrene/butadiene<br>polypropylene                    |
| M3 WOH | poly(vinyl chloride) (42%)        | cis-1,4-polyisoprene rubber (16%)    | polybutene<br>polyether block copolymer<br>vinyl resin<br>polyurethane<br>polyester<br>trans-1,4-polyisoprene |
| M4 WOH | poly(vinyl chloride) (63%)        | polyurethane (8%)                    | polyester<br>cis-1,4-polyisoprene rubber<br>trans-1,4-polyisoprene<br>polyacrylonitrile                       |
| M5 WOH | poly(vinyl chloride) (66%)        | polyester block copolymer (11%)      | polyether imide<br>vinyl resin                                                                                |
| M6 WOH | poly(vinyl chloride) (33%)        | cis-1,4-polyisoprene rubber (33%)    | high-density polyethylene<br>trans-1,4-polyisoprene<br>polyetherimide<br>vinyl resin                          |
| M1 WH  | poly(vinyl chloride) (35%)        | cis-1,4-polyisoprene rubber (30%)    | polybutene<br>hydrogenated styrene/butadiene                                                                  |
| M2 WH  | cis-1,4-polyisoprene rubber (33%) | poly(vinyl chloride) (25%)           | polybutene<br>polyethylene terephthalate<br>hydrogenated styrene/butadiene<br>trans-1,4-polyisoprene          |
| M3 WH  | cis-1,4-polyisoprene rubber (34%) | poly(vinyl chloride) (23%)           | hydrogenated styrene/butadiene<br>trans-1,4-polyisoprene<br>polybutene<br>polypropylene                       |
| M4 WH  | cis-1,4-polyisoprene rubber (33%) | hydrogenated styrene/butadiene (33%) | poly(vinyl chloride)<br>polybutene                                                                            |
| M5 WH  | cis-1,4-polyisoprene rubber (33%) | hydrogenated styrene/butadiene (24%) | high density polyethylene<br>polybutylene<br>trans-1,4-polyisoprene                                           |
| M6 WH  | high density polyethylene (58%)   | cis-1,4-polyisoprene rubber (31%)    | polybutene<br>trans-1,4-polyisoprene                                                                          |

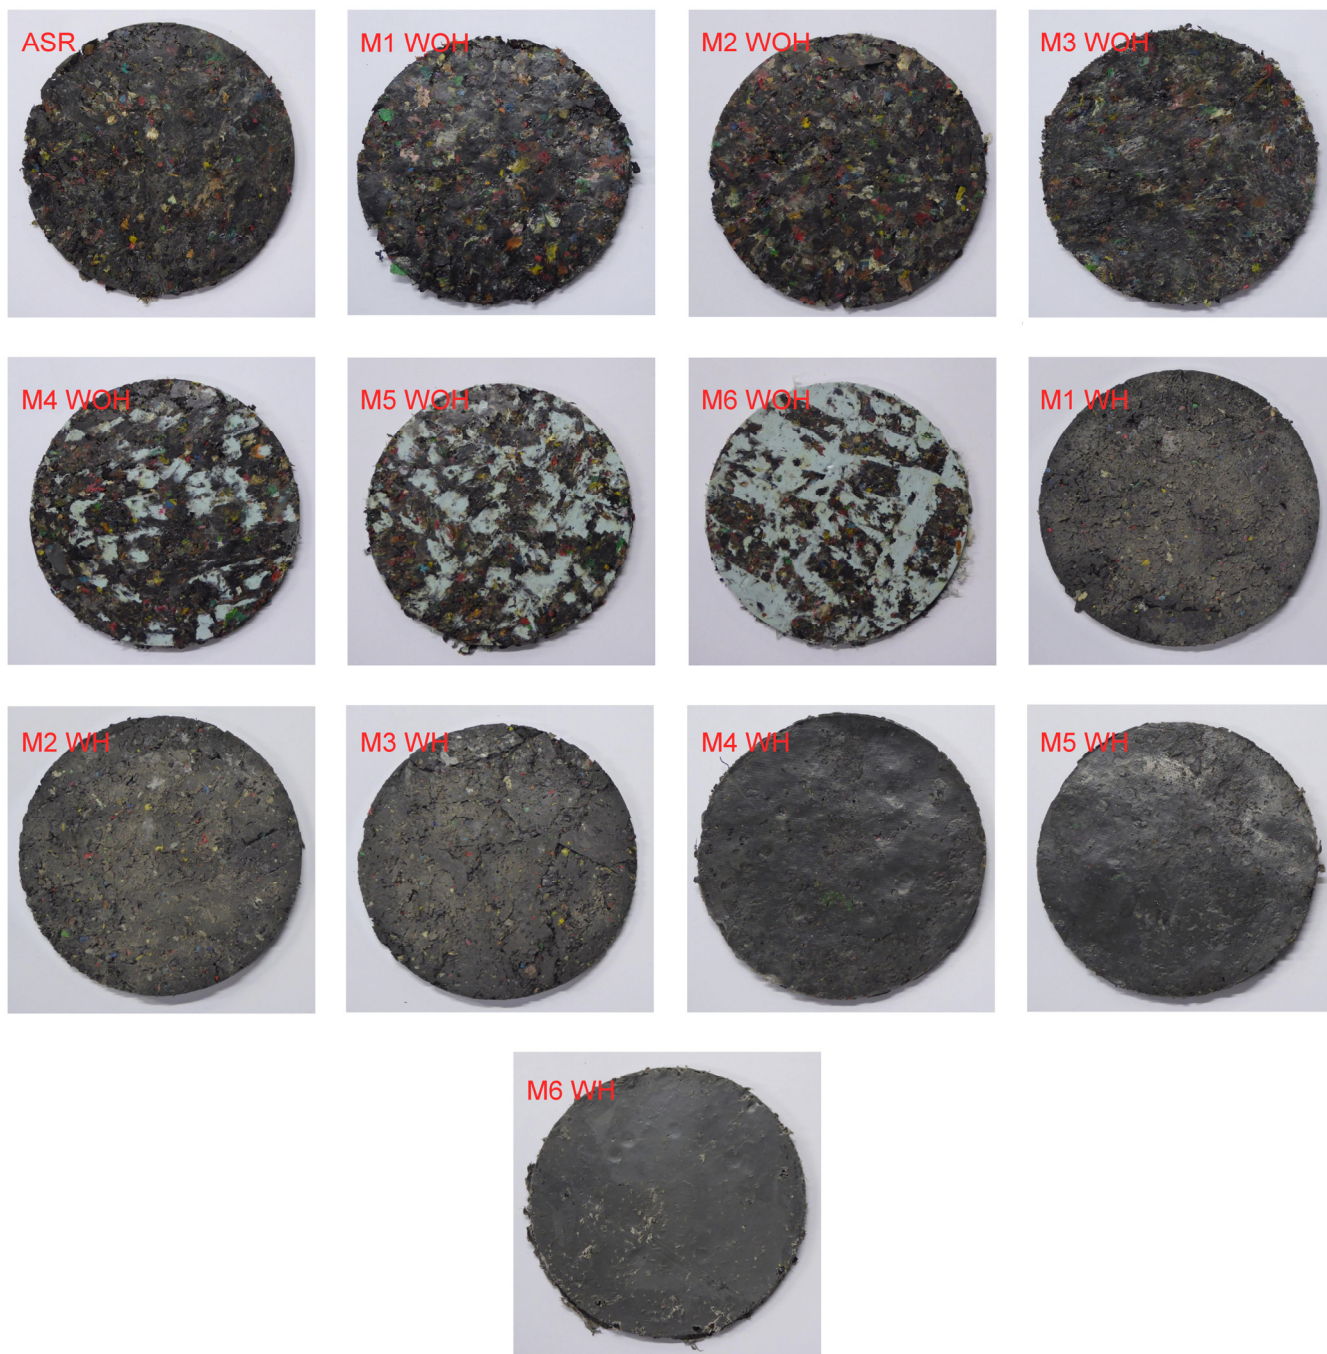

**Figure S14.** 100 mm samples used for acoustic properties determination.
